# Supplementary material for: Long-Term Data Reveal a Population Decline of the Tropical Lizard Anolis apletophallus, and a Negative Affect of El Nino Years on Population Growth Rate
Source: PLOS journal article supplement (doi:10.1371/journal.pone.0115450), 2015-02-11
Supplement: S21 (10.1371/journal.pone.0115450.s021) [file journal.pone.0115450.s021]

## **Supporting Information S2: Climate Data.**

Climate variables were calculated from temperature and rainfall data from BCI provided by the Terrestrial-Environmental Sciences Program of the Smithsonian Tropical Research Institute. We calculated climate change indices used previously by Aguilar et al [1] . Rainfall indices were calculated using RClimdex (<http://etccdi.pacificclimate.org/software.shtml>), but because of missing data, RClimdex could not be used to calculate indices for maximum and minimum temperature, instead these were calculated separately using custom scripts in R. The Southern Oscillation Index (SOI, National Centre for Atmospheric Research, <http://www.cgd.ucar.edu/cas/catalog/limind/soi.html>) was also included as a climate variable. Linear regression of raw (untransformed) data was used to investigate if climate variables have changed with time (Table S2, S3) and how SOI was related climate variables (Table S2.2, Figures S2.4, S2.5)

### **References:**

1. Aguilar E, Peterson TC, Obando PR, Frutos R, Retana JA, et al. (2005) Changes in precipitation and temperature extremes in Central America and northern South America, 1961-2003. *Journal of Geophysical Research: Atmospheres* 110: D23107.

**Table S2.1.** Climate change indices a) taken from [1] and b) indices designed specifically for this study.

| a)           |                                           |                                                                                                          |              |
|--------------|-------------------------------------------|----------------------------------------------------------------------------------------------------------|--------------|
| <u>ID</u>    | <u>Indicator name</u>                     | <u>Definitions</u>                                                                                       | <u>UNITS</u> |
| TXx          | Max Tmax                                  | Monthly maximum value of daily maximum temp                                                              | °C           |
| TNx          | Max Tmin                                  | Monthly maximum value of daily minimum temp                                                              | °C           |
| TXn          | Min Tmax                                  | Monthly minimum value of daily maximum temp                                                              | °C           |
| TNn          | Min Tmin                                  | Monthly minimum value of daily minimum temp                                                              | °C           |
| TN10p        | Cool nights                               | Percentage of days when TN<10th percentile                                                               | Days         |
| TX10p        | Cool days                                 | Percentage of days when TX<10th percentile                                                               | Days         |
| TN90p        | Warm nights                               | Percentage of days when TN>90th percentile                                                               | Days         |
| TX90p        | Warm days                                 | Percentage of days when TX>90th percentile                                                               | Days         |
| DTR          | Diurnal temperature range                 | Monthly mean difference between TX and TN                                                                | °C           |
| RX1day       | Max 1-day precipitation amount            | Monthly maximum 1-day precipitation                                                                      | Mm           |
| Rx5day       | Max 5-day precipitation amount            | Monthly maximum consecutive 5-day precipitation                                                          | Mm           |
| SDII         | Simple daily intensity index              | Annual total precipitation divided by the number of wet days (defined as PRCP>=1.0mm) in the year        | Mm/day       |
| R10          | Number of heavy precipitation days        | Annual count of days when PRCP>=10mm                                                                     | Days         |
| R20          | Number of very heavy precipitation days   | Annual count of days when PRCP>=20mm                                                                     | Days         |
| CDD          | Consecutive dry days                      | Maximum number of consecutive days with RR<1mm                                                           | Days         |
| CWD          | Consecutive wet days                      | Maximum number of consecutive days with RR>=1mm                                                          | Days         |
| R95p         | Very wet days                             | Annual total PRCP when RR>95 <sup>th</sup> percentile                                                    | Mm           |
| R99p         | Extremely wet days                        | Annual total PRCP when RR>99 <sup>th</sup> percentile                                                    | mm           |
| PRCPTOT      | Annual total wet-day precipitation        | Annual total PRCP in wet days (RR>=1mm)                                                                  | mm           |
| b)           |                                           |                                                                                                          |              |
| <u>ID</u>    | <u>Indicator name</u>                     | <u>Definitions</u>                                                                                       | <u>UNITS</u> |
| Tmax>PB<br>T | Days exceeding preferred body temperature | Number of days maximum temperature exceeds <i>Anolis apletophallus</i> preferred body temperature (27°C) | Days         |
| MWT          | Maximum wet season temperature            | Average TX for June, July and August                                                                     | °C           |
| MDT          | Maximum dry season temperature            | Average TX for January, February and March                                                               | °C           |

**Table S2.2.** Results table of linear relationships between climate change indices and time from 1971 – 2011 (untransformed data). Bold indicates significant ( $p < 0.05$ ) changes through time.

|                                                | Slope        | SE           | $r^2$       | p-value          |
|------------------------------------------------|--------------|--------------|-------------|------------------|
| Total precipitation                            | 9.60         | 7.20         | 0.01        | 0.19             |
| <b>Rainfall intensity<sup>+</sup></b>          | <b>0.14</b>  | <b>0.05</b>  | <b>0.14</b> | <b>0.009</b>     |
| Heavy precipitation days <sup>+</sup>          | 0.03         | 0.15         | -0.02       | 0.83             |
| Very heavy precipitation days <sup>+</sup>     | 0.14         | 0.11         | 0.01        | 0.20             |
| Consecutive dry days                           | -0.15        | 0.12         | 0.01        | 0.24             |
| Consecutive wet days                           | 0.05         | 0.06         | -0.006      | 0.39             |
| <b>Very wet days</b>                           | <b>5.54</b>  | <b>5.46</b>  | <b>0.15</b> | <b>0.007</b>     |
| <b>Extremely wet days</b>                      | <b>6.39</b>  | <b>2.13</b>  | <b>0.16</b> | <b>0.004</b>     |
| Wet season length                              | 4.31         | 2.99         | 0.02        | 0.15             |
| Wet season rainfall                            | 3.62         | 2.26         | 0.03        | 0.11             |
| Southern oscillation index (SOI)               | 0.007        | 0.01         | -0.01       | 0.64             |
| <b>Diurnal temperature range<sup>+</sup></b>   | <b>-0.14</b> | <b>0.02</b>  | <b>0.39</b> | <b>&lt;0.001</b> |
| <b>Maximum temperature<sup>+</sup></b>         | <b>-0.05</b> | <b>0.01</b>  | <b>0.20</b> | <b>0.003</b>     |
| <b>Minimum temperature</b>                     | <b>0.08</b>  | <b>0.01</b>  | <b>0.37</b> | <b>&lt;0.001</b> |
| Percentage of warm days <sup>+</sup>           | -0.002       | 0.001        | 0.04        | 0.12             |
| Percentage of cool days <sup>-</sup>           | -0.0004      | 0.001        | -0.02       | 0.73             |
| Percentage of warm nights <sup>+</sup>         | 0.001        | 0.001        | 0.01        | 0.20             |
| <b>Percentage of cool nights<sup>-</sup></b>   | <b>-0.01</b> | <b>0.002</b> | <b>0.50</b> | <b>&lt;0.001</b> |
| Days when max temperature above PBT (Tmax>PBT) | -0.002       | 0.002        | -0.01       | 0.46             |
| Max dry season temperature                     | -0.02        | 0.01         | 0.07        | 0.06             |
| <b>Max wet season temperature</b>              | <b>-0.07</b> | <b>0.01</b>  | <b>0.26</b> | <b>0.008</b>     |

<sup>+</sup> increased significantly in the region [1]

<sup>-</sup> decreased significantly in the region [1]

**Table S2.3** Relationship between southern oscillation index (SOI) with other climate variables (transformed and standardised variables). Text in bold indicates a significant linear relationship ( $p < 0.05$ ).

|                                                | Slope        | SE          | $r^2$       | p-value          |
|------------------------------------------------|--------------|-------------|-------------|------------------|
| Total precipitation                            | 0.28         | 0.15        | 0.05        | 0.07             |
| <b>Rainfall intensity</b>                      | <b>0.30</b>  | <b>0.15</b> | <b>0.06</b> | <b>0.05</b>      |
| Heavy precipitation days                       | 0.07         | 0.15        | -0.02       | 0.64             |
| Very heavy precipitation days                  | 0.24         | 0.15        | 0.03        | 0.12             |
| Consecutive dry days                           | -0.12        | 0.16        | -0.01       | 0.43             |
| Consecutive wet days                           | 0.21         | 0.15        | 0.02        | 0.17             |
| <b>Very wet days</b>                           | <b>0.34</b>  | <b>0.15</b> | <b>0.09</b> | <b>0.03</b>      |
| Extremely wet days                             | 0.26         | 0.15        | 0.04        | 0.09             |
| Wet season length                              | 0.24         | 0.15        | 0.03        | 0.12             |
| Wet season rainfall                            | 0.06         | 0.15        | -0.02       | 0.66             |
| Diurnal temperature range                      | 0.15         | 0.17        | -0.001      | 0.36             |
| Max temperature                                | -0.01        | 0.17        | -0.02       | 0.97             |
| <b>Min temperature</b>                         | <b>-0.40</b> | <b>0.16</b> | <b>0.13</b> | <b>0.01</b>      |
| Percentage of warm days                        | -0.01        | 0.17        | -0.02       | 0.94             |
| <b>Percentage of cool nights</b>               | <b>0.46</b>  | <b>0.15</b> | <b>0.18</b> | <b>0.005</b>     |
| <b>Percentage of warm nights</b>               | <b>-0.65</b> | <b>0.13</b> | <b>0.39</b> | <b>&lt;0.001</b> |
| Percentage of cool days                        | 0.19         | 0.17        | 0.008       | 0.26             |
| Days when max temperature above PBT (Tmax>PBT) | 0.25         | 0.16        | 0.03        | 0.13             |
| Max dry season temperature                     | -0.08        | 0.17        | -0.02       | 0.61             |
| Max wet season temperature                     | 0.003        | 0.17        | -0.02       | 0.98             |
