# Supplementary material for: Long-Term Data Reveal a Population Decline of the Tropical Lizard Anolis apletophallus, and a Negative Affect of El Nino Years on Population Growth Rate
Source: PLOS journal article supplement (doi:10.1371/journal.pone.0115450), 2015-02-11
Supplement: S23 (10.1371/journal.pone.0115450.s023) [file journal.pone.0115450.s023]

**Table S1. Description of climate change indices used in the study.**

Climate change indices a) taken from (Aguilar et al. 2005) and b) indices designed specifically for this study.

a)

| <u>ID</u> | <u>Indicator name</u>                   | <u>Definitions</u>                                                                                | <u>UNITS</u> |
|-----------|-----------------------------------------|---------------------------------------------------------------------------------------------------|--------------|
| TXx       | Max Tmax                                | Monthly maximum value of daily maximum temp                                                       | °C           |
| TNx       | Max Tmin                                | Monthly maximum value of daily minimum temp                                                       | °C           |
| TXn       | Min Tmax                                | Monthly minimum value of daily maximum temp                                                       | °C           |
| TNn       | Min Tmin                                | Monthly minimum value of daily minimum temp                                                       | °C           |
| TN10p     | Cool nights                             | Percentage of days when TN<10th percentile                                                        | Days         |
| TX10p     | Cool days                               | Percentage of days when TX<10th percentile                                                        | Days         |
| TN90p     | Warm nights                             | Percentage of days when TN>90th percentile                                                        | Days         |
| TX90p     | Warm days                               | Percentage of days when TX>90th percentile                                                        | Days         |
| DTR       | Diurnal temperature range               | Monthly mean difference between TX and TN                                                         | °C           |
| RX1day    | Max 1-day precipitation amount          | Monthly maximum 1-day precipitation                                                               | Mm           |
| Rx5day    | Max 5-day precipitation amount          | Monthly maximum consecutive 5-day precipitation                                                   | Mm           |
| SDII      | Simple daily intensity index            | Annual total precipitation divided by the number of wet days (defined as PRCP>=1.0mm) in the year | Mm/day       |
| R10       | Number of heavy precipitation days      | Annual count of days when PRCP>=10mm                                                              | Days         |
| R20       | Number of very heavy precipitation days | Annual count of days when PRCP>=20mm                                                              | Days         |
| CDD       | Consecutive dry days                    | Maximum number of consecutive days with RR<1mm                                                    | Days         |
| CWD       | Consecutive wet days                    | Maximum number of consecutive days with RR>=1mm                                                   | Days         |
| R95p      | Very wet days                           | Annual total PRCP when RR>95 <sup>th</sup> percentile                                             | Mm           |
| R99p      | Extremely wet days                      | Annual total PRCP when RR>99 <sup>th</sup> percentile                                             | mm           |
| PRCPTOT   | Annual total wet-day precipitation      | Annual total PRCP in wet days (RR>=1mm)                                                           | mm           |

b)

| <u>ID</u>    | <u>Indicator name</u>                 | <u>Definitions</u>                                                                                   | <u>UNITS</u> |
|--------------|---------------------------------------|------------------------------------------------------------------------------------------------------|--------------|
| Tmax>FB<br>T | Days exceeding field body temperature | Number of days maximum temperature exceeds <i>Anolis apletophallus</i> field body temperature (27°C) | Days         |
| MWT          | Maximum wet season temperature        | Average TX for June, July and August                                                                 | °C           |
| MDT          | Maximum dry season temperature        | Average TX for January, February and March                                                           | °C           |
